# Supplementary material for: Improving cellulase production in submerged fermentation by the expression of a Vitreoscilla hemoglobin in Trichoderma reesei
Source: PubMed Central journal article supplement (PMC5688050; doi:10.1186/s13568-017-0507-x), 2017-11-15
Supplement: 13568_2017_507_MOESM1_ESM.pdf [file 13568_2017_507_MOESM1_ESM.pdf]

**Figure S1**

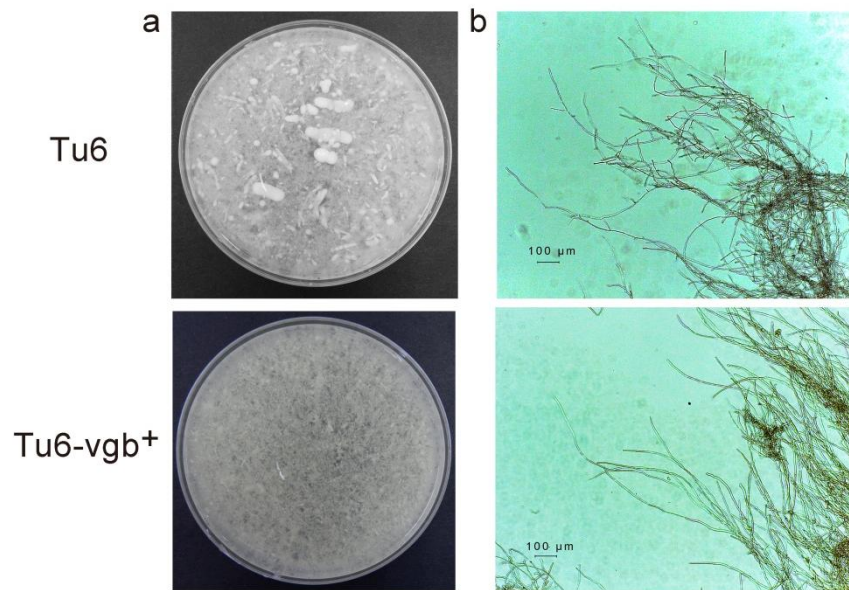

**Figure S1** Morphology of TU-6 and TU6-vgb<sup>+</sup> after growth in MM-glucose. **(a)** The hyphal phenotypes of the two *T. reesei* strains cultivated in flasks as observed by the naked eye. **(b)** Microscopic observations of hyphae from TU-6 and TU6-vgb<sup>+</sup>
