# Supplementary material for: Improving cellulase production in submerged fermentation by the expression of a Vitreoscilla hemoglobin in Trichoderma reesei
Source: PubMed Central journal article supplement (PMC5688050; doi:10.1186/s13568-017-0507-x), 2017-11-15
Supplement: 13568_2017_507_MOESM2_ESM.pdf [file 13568_2017_507_MOESM2_ESM.pdf]

**Figure S2**

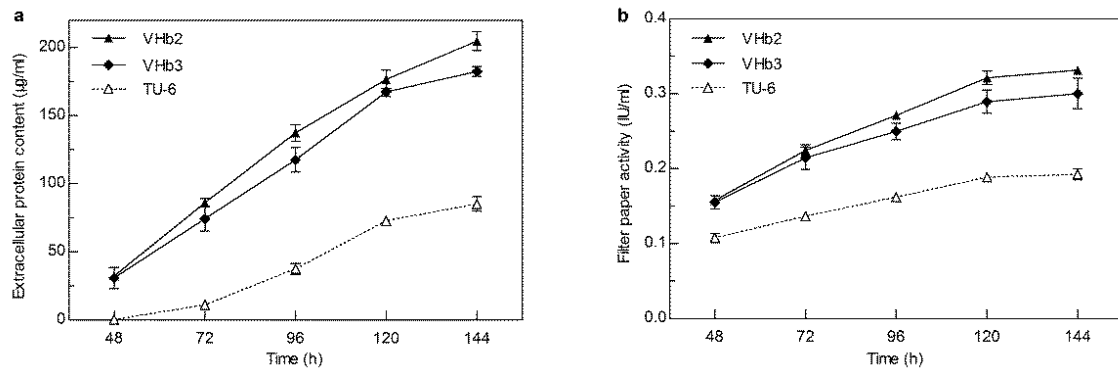

**Figure S2** Time course determination of the extracellular protein concentration (a) and FPase activity (b) in the Vhb-expressing strains Vhb2 and Vhb3 in cellulase-inducing medium under oxygen-limiting conditions. Vhb2 (filled triangle) and Vhb3 (filled diamond) are shown as black solid lines and TU-6 (hollow triangle) is shown as dashed lines. Data represented are the means of three independent cultures
